# Supplementary material for: In situ room-temperature fabrication of a covalent organic framework and its bonded fiber for solid-phase microextraction of polychlorinated biphenyls in aquatic products
Source: Royal Society of Chemistry journal article supplement (doi:10.1039/c9ta02974e), 2019-01-01
Supplement: c9ta02974e1.pdf [file c9ta02974e1.pdf]

## Electronic Supplementary Information

### **In-Situ room-temperature fabrication of a covalent organic framework and its bonded fiber for solid-phase microextraction of polychlorinated biphenyls in aquatic products**

Jing-Xuan Guo,<sup>abc</sup> Hai-Long Qian,<sup>abc</sup> Xu Zhao,<sup>abc</sup> Cheng Yang<sup>c</sup> and Xiu-Ping Yan<sup>\*abcd</sup>

<sup>a</sup> State Key laboratory of Food Science and Technology, Jiangnan University, Wuxi 214122, China

<sup>b</sup> International Joint Laboratory on Food Safety, Jiangnan University, Wuxi 214122, China

<sup>c</sup> Institute of Analytical Food Safety, School of Food Science and Technology, Jiangnan University, Wuxi 214122, China

<sup>d</sup> Key Laboratory of Synthetic and Biological Colloids, Ministry of Education, Jiangnan University, Wuxi, 214122, China

\*Corresponding author: Tel.: +86-510-85916732; Email: xpyan@jiangnan.edu.cn

### **Table of Contents**

1. Supplementary Figures
2. Supplementary Tables

## 1. Supplementary Figures

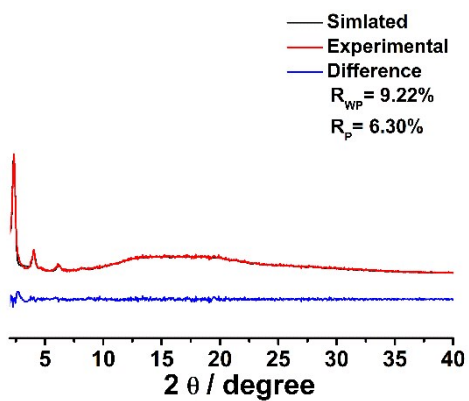

Fig. S1 Pawley refinement of TFPB-BD.

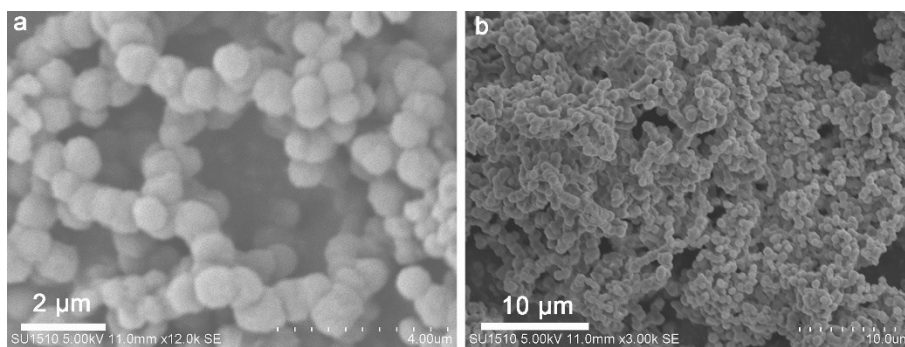

Fig. S2 SEM images of TFPB-BD powder with magnification at (a) 12000 $\times$ ; (b) 3000 $\times$ .

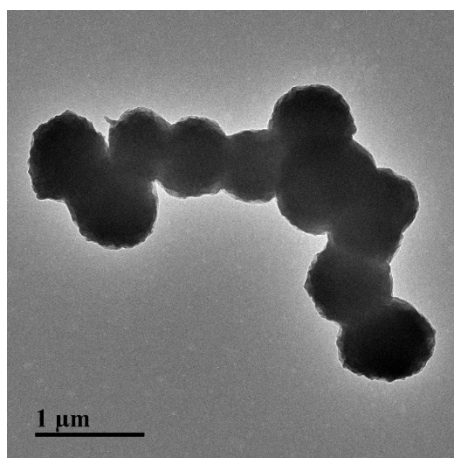

Fig. S3 TEM image of TFPB-BD.

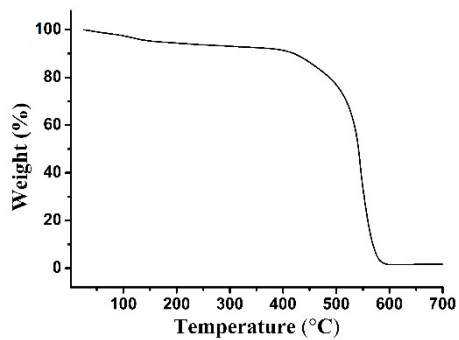

**Fig. S4** TGA curves of the TFPB-BD.

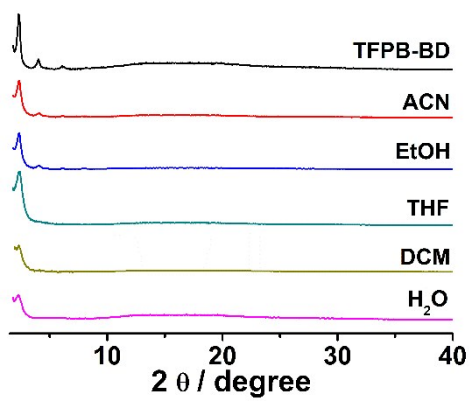

**Fig. S5** PXRD patterns of TFPB-BD after treatment with different solvents for 24 h.

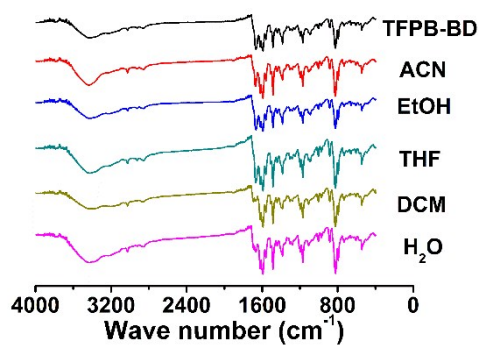

**Fig. S6** FT-IR spectra of TFPB-BD after treatment with different solvents for 24 h.

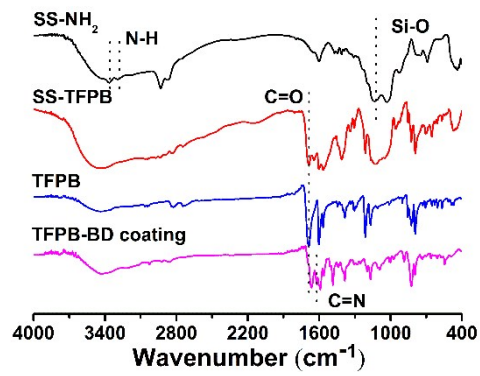

Fig. S7 FT-IR spectra of powders scraped from SS-NH<sub>2</sub> (black), SS-TFPB (red) SS-TFPB-BD (magenta) fibers and monomer TFPB (blue).

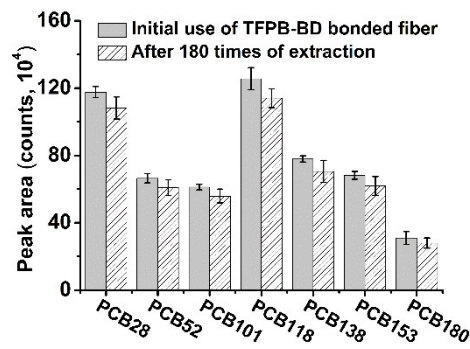

Fig. S8. Comparison of the peak areas of 100 ng L<sup>-1</sup> PCBs obtained with the fresh TFPB-BD bonded fiber and the reused TFPB-BD bonded fiber after 180 cycles extraction

## 2. Supplementary Tables

**Table S1** Other Parameters for the Determination of PCBs

| Compound | Retention time (min) | MS1→MS2     | CE (eV) |
|----------|----------------------|-------------|---------|
| PCB28    | 6.68                 | 255.8→186   | 30      |
|          |                      | 257.8→186   | 32      |
| PCB52    | 6.91                 | 289.8→220   | 38      |
|          |                      | 291.8→220   | 38      |
| PCB101   | 7.5                  | 323.7→253.9 | 34      |
|          |                      | 325.7→255.9 | 32      |
| PCB118   | 7.94                 | 323.7→253.9 | 30      |
|          |                      | 325.7→255.8 | 30      |
| PCB138   | 8.09                 | 361.7→291.7 | 34      |
|          |                      | 359.7→289.7 | 35      |
| PCB153   | 8.29                 | 361.7→291.7 | 28      |
|          |                      | 359.7→289.8 | 32      |
| PCB180   | 8.77                 | 393.7→323.8 | 38      |
|          |                      | 395.7→325.7 | 38      |

**Table S2** Fractional main atomic coordinates for the unit cell of TFPB-BD after Pawley refinement.

**TFPB-BD: Space group symmetry P6/m**

**a= b = 43.7789 Å, c = 4.0603 Å,  $\alpha = \beta = 90^\circ$  and  $\gamma = 120^\circ$**

| Atom | x       | y       | z       |
|------|---------|---------|---------|
| C1   | 0.32022 | 0.68798 | 0.50000 |
| C2   | 0.35481 | 0.70135 | 0.50000 |
| C3   | 0.37825 | 0.73921 | 0.50000 |
| C4   | 0.36496 | 0.76174 | 0.50000 |
| C5   | 0.38706 | 0.79738 | 0.50000 |
| C6   | 0.42290 | 0.81125 | 0.50000 |
| C7   | 0.43624 | 0.78887 | 0.50000 |
| C8   | 0.41417 | 0.75323 | 0.50000 |
| C9   | 0.44667 | 0.84881 | 0.50000 |
| N10  | 0.43488 | 0.87005 | 0.50000 |
| C11  | 0.45454 | 0.90703 | 0.50000 |
| C12  | 0.49064 | 0.92578 | 0.50000 |
| C13  | 0.50825 | 0.96178 | 0.50000 |
| C14  | 0.49047 | 0.98047 | 0.50000 |
| C15  | 0.45404 | 0.96092 | 0.50000 |
| C16  | 0.43663 | 0.92496 | 0.50000 |
| H17  | 0.33743 | 0.75173 | 0.50000 |
| H18  | 0.37624 | 0.81421 | 0.50000 |
| H19  | 0.46379 | 0.79901 | 0.50000 |
| H20  | 0.42517 | 0.73655 | 0.50000 |
| H21  | 0.47396 | 0.85798 | 0.50000 |
| H22  | 0.50568 | 0.91311 | 0.50000 |
| H23  | 0.53586 | 0.97417 | 0.50000 |
| H24  | 0.43812 | 0.97255 | 0.50000 |
| H25  | 0.40879 | 0.91071 | 0.50000 |

**Table S3** Analytical results ( $\mu\text{g kg}^{-1}$ , mean  $\pm$  s,  $n=6$ ) for the determination of PCBs in aquatic products

| Analyte | Snakehead       |                                       | Bream           |                                       | Catfish         |                                       | Crucian         |                                       | Base shrimp |                                       | White shrimp    |                                       |
|---------|-----------------|---------------------------------------|-----------------|---------------------------------------|-----------------|---------------------------------------|-----------------|---------------------------------------|-------------|---------------------------------------|-----------------|---------------------------------------|
|         | no spiking      | spiked with 1.0 $\mu\text{g kg}^{-1}$ | no spiking      | spiked with 1.0 $\mu\text{g kg}^{-1}$ | no spiking      | spiked with 1.0 $\mu\text{g kg}^{-1}$ | no spiking      | spiked with 1.0 $\mu\text{g kg}^{-1}$ | no spiking  | spiked with 1.0 $\mu\text{g kg}^{-1}$ | no spiking      | spiked with 1.0 $\mu\text{g kg}^{-1}$ |
| PCB28   | 0.54 $\pm$ 0.08 | 1.47 $\pm$ 0.04                       | 0.46 $\pm$ 0.06 | 1.37 $\pm$ 0.04                       | <LOD            | 0.99 $\pm$ 0.09                       | 0.74 $\pm$ 0.06 | 1.66 $\pm$ 0.04                       | <LOD        | 0.98 $\pm$ 0.04                       | 0.57 $\pm$ 0.02 | 1.55 $\pm$ 0.04                       |
| PCB52   | 0.45 $\pm$ 0.04 | 1.41 $\pm$ 0.03                       | 0.62 $\pm$ 0.21 | 1.51 $\pm$ 0.06                       | <LOQ            | 0.87 $\pm$ 0.06                       | 1.01 $\pm$ 0.10 | 1.90 $\pm$ 0.02                       | <LOD        | 0.96 $\pm$ 0.01                       | <LOQ            | 0.93 $\pm$ 0.05                       |
| PCB101  | <LOD            | 0.88 $\pm$ 0.03                       | 0.83 $\pm$ 0.15 | 1.73 $\pm$ 0.04                       | <LOQ            | 0.94 $\pm$ 0.03                       | 0.59 $\pm$ 0.02 | 1.49 $\pm$ 0.06                       | <LOD        | 0.92 $\pm$ 0.08                       | 0.33 $\pm$ 0.05 | 1.31 $\pm$ 0.07                       |
| PCB118  | 0.83 $\pm$ 0.15 | 1.78 $\pm$ 0.08                       | 0.97 $\pm$ 0.12 | 1.95 $\pm$ 0.08                       | 0.61 $\pm$ 0.03 | 1.49 $\pm$ 0.02                       | 1.34 $\pm$ 0.03 | 2.24 $\pm$ 0.01                       | <LOQ        | 0.95 $\pm$ 0.08                       | 0.39 $\pm$ 0.07 | 1.32 $\pm$ 0.03                       |
| PCB138  | 0.42 $\pm$ 0.07 | 1.29 $\pm$ 0.03                       | 1.28 $\pm$ 0.26 | 2.15 $\pm$ 0.02                       | 0.79 $\pm$ 0.09 | 1.71 $\pm$ 0.01                       | 1.46 $\pm$ 0.17 | 2.37 $\pm$ 0.02                       | <LOD        | 0.94 $\pm$ 0.01                       | <LOQ            | 0.90 $\pm$ 0.01                       |
| PCB153  | <LOQ            | 0.98 $\pm$ 0.04                       | 1.48 $\pm$ 0.23 | 2.43 $\pm$ 0.02                       | 0.84 $\pm$ 0.13 | 1.72 $\pm$ 0.01                       | 1.04 $\pm$ 0.11 | 2.01 $\pm$ 0.08                       | <LOQ        | 0.89 $\pm$ 0.02                       | <LOD            | 0.97 $\pm$ 0.01                       |
| PCB180  | <LOQ            | 0.87 $\pm$ 0.06                       | <LOQ            | 0.93 $\pm$ 0.03                       | <LOQ            | 0.93 $\pm$ 0.09                       | <LOQ            | 0.91 $\pm$ 0.01                       | <LOD        | 1.00 $\pm$ 0.03                       | <LOQ            | 0.95 $\pm$ 0.03                       |
